# Supplementary material
Source: Frontiers journal article supplement (https://www.frontiersin.org/articles/438958)
Supplement: Table_3.pdf [file Table_3.pdf]

**Table S3. Criteria for the interpretation of hemolytic activity data of *Vibrio cholerae* non-O1, non-O139 isolates from German coastal waters analyzed in this study.**

| <b>Mean diameter of the hemolytic halo (mm)</b>  | <b>Category<sup>a</sup></b> |
|--------------------------------------------------|-----------------------------|
| No hemolysis                                     | -                           |
| Hemolysis only under the macrocolony or $\leq 1$ | +                           |
| $> 1$ and $< 4$                                  | ++                          |
| $\geq 4$                                         | +++                         |

<sup>a</sup> (-), non-hemolytic; (+), weakly hemolytic; (++)  
intermediately hemolytic; (+++), strongly hemolytic.
