# Supplementary material
Source: Frontiers journal article supplement (https://www.frontiersin.org/articles/438958)
Supplement: Table_6.pdf [file Table_6.pdf]

**Table S6. MLST properties of the *Vibrio cholerae* non-O1, non-O139 populations analyzed in this study.**

|                                  |                                  | Total <sup>a</sup><br>(n = 108) | Environmental <sup>a</sup><br>(n = 98) | Baltic Sea <sup>a</sup><br>(n = 48) | North Sea<br>(n = 50) | Clinical<br>(n = 10) | PubMLST <sup>b</sup> |
|----------------------------------|----------------------------------|---------------------------------|----------------------------------------|-------------------------------------|-----------------------|----------------------|----------------------|
| Alleles                          |                                  |                                 |                                        |                                     |                       |                      |                      |
| <i>adk</i>                       | n <sub>t</sub> (p <sub>t</sub> ) | 32 (13.0%)                      | 31 (13.1%)                             | 22 (14.4%)                          | 18 (14.0%)            | 6 (14.3%)            | 105 (9.9%)           |
|                                  | n <sub>n</sub> (p <sub>n</sub> ) | 20 (62.5%)                      | 19 (61.3%)                             | 12 (54.5%)                          | 11 (61.1%)            | 4 (66.7%)            |                      |
| <i>gyrB</i>                      | n <sub>t</sub> (p <sub>t</sub> ) | 30 (12.2%)                      | 30 (12.7%)                             | 18 (11.8%)                          | 18 (14.0%)            | 5 (11.9%)            | 116 (10.9%)          |
|                                  | n <sub>n</sub> (p <sub>n</sub> ) | 17 (56.7%)                      | 17 (56.7%)                             | 8 (44.4%)                           | 10 (55.6%)            | 3 (60.0%)            |                      |
| <i>mdh</i>                       | n <sub>t</sub> (p <sub>t</sub> ) | 25 (10.2%)                      | 25 (10.5%)                             | 17 (11.1%)                          | 14 (10.9%)            | 4 (9.5%)             | 121 (11.4%)          |
|                                  | n <sub>n</sub> (p <sub>n</sub> ) | 14 (56.0%)                      | 14 (56.0%)                             | 7 (41.2%)                           | 10 (71.4%)            | 1 (25.0%)            |                      |
| <i>metE</i>                      | n <sub>t</sub> (p <sub>t</sub> ) | 56 (22.8%)                      | 51 (21.5%)                             | 30 (19.6%)                          | 25 (19.4%)            | 8 (19.0%)            | 270 (25.5%)          |
|                                  | n <sub>n</sub> (p <sub>n</sub> ) | 44 (78.6%)                      | 40 (78.4%)                             | 23 (76.7%)                          | 19 (76.0%)            | 7 (87.5%)            |                      |
| <i>pntA</i>                      | n <sub>t</sub> (p <sub>t</sub> ) | 38 (15.4%)                      | 37 (15.6%)                             | 28 (18.3%)                          | 18 (14.0%)            | 7 (16.7%)            | 154 (14.5%)          |
|                                  | n <sub>n</sub> (p <sub>n</sub> ) | 19 (50.0%)                      | 19 (51.4%)                             | 13 (46.4%)                          | 9 (50.0%)             | 4 (57.1%)            |                      |
| <i>purM</i>                      | n <sub>t</sub> (p <sub>t</sub> ) | 20 (8.1%)                       | 20 (8.4%)                              | 12 (7.8%)                           | 14 (10.9%)            | 5 (11.9%)            | 96 (9.1%)            |
|                                  | n <sub>n</sub> (p <sub>n</sub> ) | 14 (70.0%)                      | 14 (70.0%)                             | 9 (75.0%)                           | 9 (64.3%)             | 2 (40.0%)            |                      |
| <i>pyrC</i>                      | n <sub>t</sub> (p <sub>t</sub> ) | 45 (18.3%)                      | 43 (18.1%)                             | 26 (17.0%)                          | 22 (17.1%)            | 7 (16.7%)            | 198 (18.7%)          |
|                                  | n <sub>n</sub> (p <sub>n</sub> ) | 34 (75.6%)                      | 32 (74.4%)                             | 19 (73.1%)                          | 17 (77.3%)            | 5 (71.4%)            |                      |
| total                            | n <sub>t</sub> (p <sub>t</sub> ) | 246 (100%)                      | 237 (100%)                             | 153 (100%)                          | 129 (100%)            | 42 (100%)            | 1060 (100%)          |
|                                  | n <sub>n</sub> (p <sub>n</sub> ) | 162 (65.9%)                     | 155 (65.4%)                            | 91 (59.5%)                          | 85 (65.9%)            | 26 (61.9%)           |                      |
| Sequence types                   |                                  |                                 |                                        |                                     |                       |                      |                      |
| n <sub>t</sub>                   |                                  | 74                              | 66                                     | 42                                  | 25                    | 8                    | 718                  |
| n <sub>n</sub> (p <sub>n</sub> ) |                                  | 71 (95.9%)                      | 63 (95.5%)                             | 40 (95.2%)                          | 24 (96.0%)            | 8 (100.0%)           |                      |

n, number of isolates; n<sub>t</sub>, total number of alleles/sequence types; p<sub>t</sub>, proportion of n<sub>t</sub> of locus X as a percentage of n<sub>t</sub> of all loci of the respective *V. cholerae* population; n<sub>n</sub>, number of new alleles/sequence types; p<sub>n</sub>, proportion of n<sub>n</sub> as a percentage of n<sub>t</sub>.

<sup>a</sup> Two *V. cholerae* strains from the Baltic Sea, VN-00455 and VN-00477, were excluded from the analyses due to failing *pyrC* amplification.

<sup>b</sup> PubMLST database as of November 5, 2018.
